# Supplementary material
Source: PubMed Central journal article supplement (PMC9050866)
Supplement: NIHMS1780101-supplement-Flow_cytometry_gating_strategy.pdf [file NIHMS1780101-supplement-Flow_cytometry_gating_strategy.pdf]

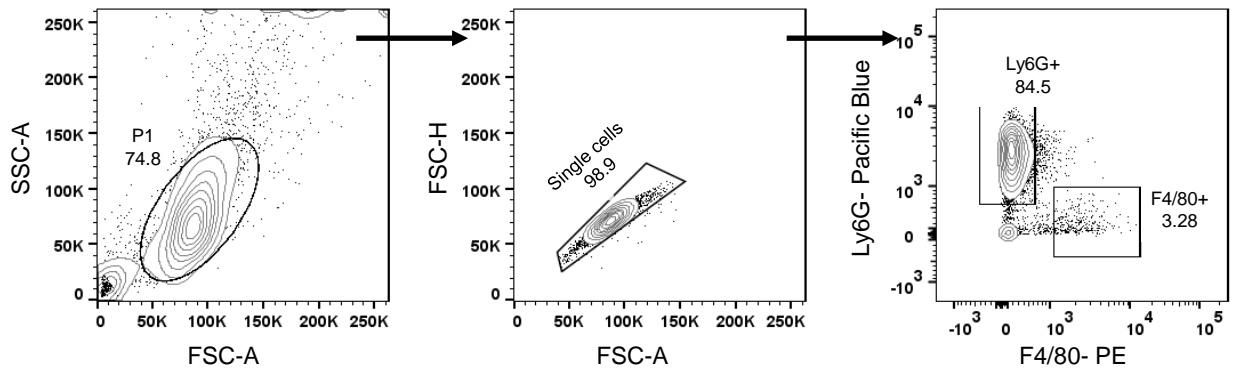

Representative gating strategy for zymosan A1 experiments (from Fig. 6f): FSC-A and SSC-A gate for removal of cell debris. This was followed by FSC-H and FSC-A to select for single cells. Cells were then gated for Ly6G<sup>+</sup> and F4/80<sup>+</sup> cells to determine percentage of PMNs and macrophages, respectively. Data shown were analyzed using FlowJo and is representative of experiments for which n=4

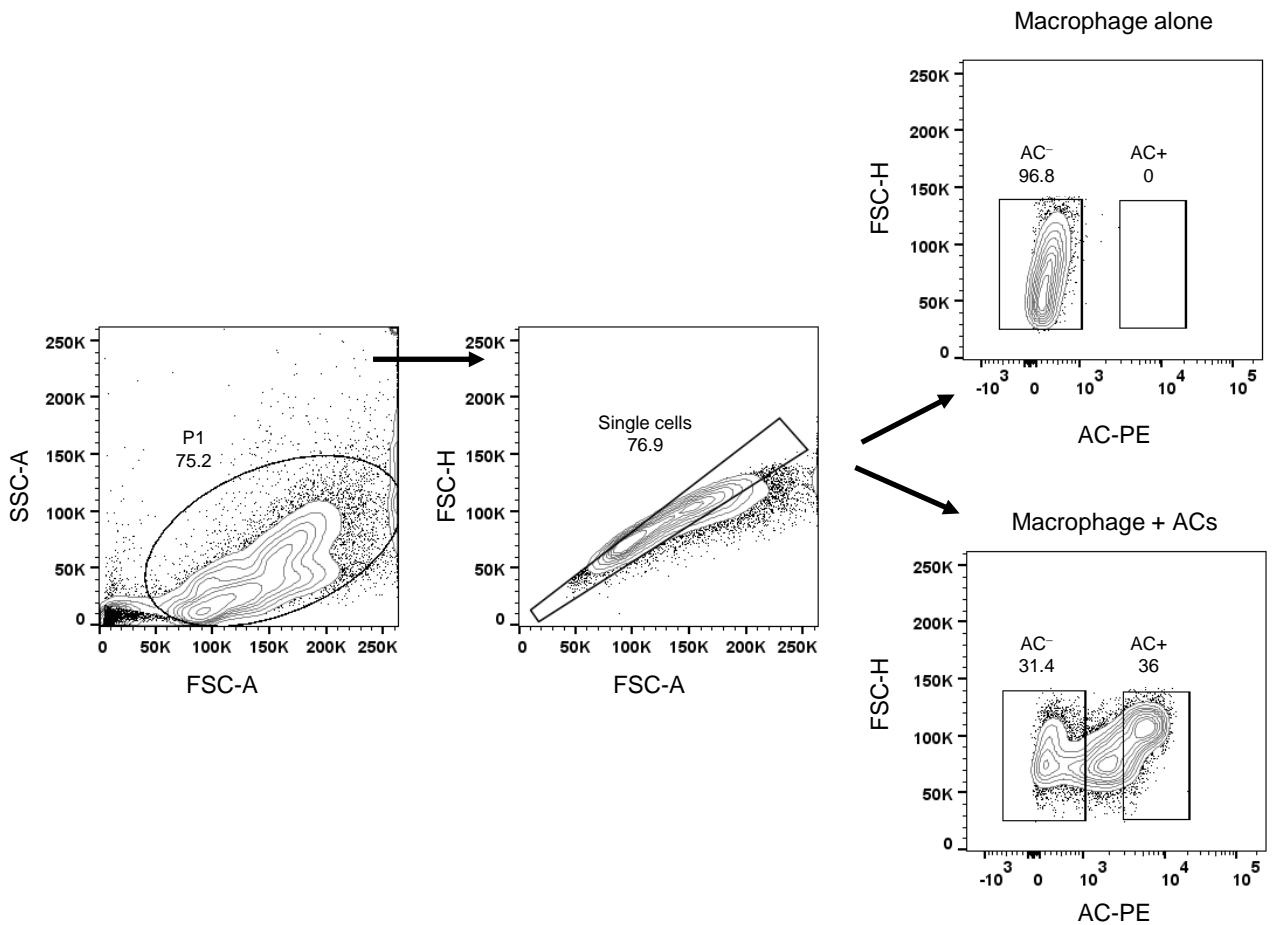

Representative gating strategy for all in vitro flow cytometry experiments involving incubation of macrophages with ACs (from Fig. 4g): FSC-A and SSC-A gating was used to remove cell debris. Followed by FSC-H and FSC-A to select for single cells. Cells were the gated for AC<sup>high</sup> (AC<sup>+</sup>) vs AC<sup>low</sup> (AC<sup>-</sup>) macrophages. Data shown was analyzed with FlowJo and representative of experiments where n=3 biological replicates.
