# Supplementary material
Source: PubMed Central journal article supplement (PMC9050866)
Supplement: NIHMS1780101-supplement-Supplemental_Information.pdf [file NIHMS1780101-supplement-Supplemental_Information.pdf]

## **Supplementary Information**

**Supplementary Table 1: Primers and RNAi list**

| Oligonucleotides                                    |                             |                                                                                            |
|-----------------------------------------------------|-----------------------------|--------------------------------------------------------------------------------------------|
| Negative Control DsiRNA                             | Integrated DNA Technologies |                                                                                            |
| Mouse: ON-TARGETplus Ptgs2 SMARTpool siRNA          | GE Healthcare Dharmacon     | L-056799-01-0005                                                                           |
| Mouse: ON-TARGETplus Dusp4 SMARTpool siRNA          | GE Healthcare Dharmacon     | L-061306-00-0005                                                                           |
| Mouse: ON-TARGETplus Dnmt3a SMARTpool siRNA         | GE Healthcare Dharmacon     | L-065433-01-0005                                                                           |
| Mouse: IDT Mapk1 DsiRNA                             | Integrated DNA Technologies | mm.Ri.Mapk1.13.3                                                                           |
| Mouse: IDT Mapk3 DsiRNA                             | Integrated DNA Technologies | mm.Ri.Mapk3.13.3                                                                           |
|                                                     |                             |                                                                                            |
| Mouse: IDT Cd36 DsiRNA                              | Integrated DNA Technologies | mm.Ri.Cd36.13.2                                                                            |
| Mouse: IDT Dnmt3a DsiRNA                            | Integrated DNA Technologies | mm.Ri.Dnmt3a.13.2                                                                          |
| Mouse: IDT Tgfb1 DsiRNA                             | Integrated DNA Technologies | mm.Ri.Tgfb1.13.2                                                                           |
| Mouse: IDT MAT2A DsiRNA                             | Integrated DNA Technologies | mm.Ri.MAT2A.13.3                                                                           |
| Mouse: IDT Ptger2 DsiRNA                            | Integrated DNA Technologies | mm.Ri.Ptger2.13.3                                                                          |
| Mouse: IDT Ptger4 DsiRNA                            | Integrated DNA Technologies | mm.Ri.Ptger4.13.3                                                                          |
| Human: ON-TARGETplus Ptgs2 SMARTpool siRNA          | GE Healthcare Dharmacon     | L-006672-01-0005                                                                           |
|                                                     |                             |                                                                                            |
| Mouse: <i>Cd36</i> Forward<br>ATGGGCTGTGATCGGAACTG  | PrimerBank                  | <a href="http://www.pga.mgh.harvard.edu/primerbank">www.pga.mgh.harvard.edu/primerbank</a> |
| Mouse: <i>Cd36</i> Reverse<br>TTTGCCACGTCATCTGGGTTT | PrimerBank                  | <a href="http://www.pga.mgh.harvard.edu/primerbank">www.pga.mgh.harvard.edu/primerbank</a> |

|                                                         |            |                                                                                            |
|---------------------------------------------------------|------------|--------------------------------------------------------------------------------------------|
| Mouse: <i>Hprt</i> Forward<br>TCAGTCAACGGGGGACATAAA     | PrimerBank | <a href="http://www.pga.mgh.harvard.edu/primerbank">www.pga.mgh.harvard.edu/primerbank</a> |
| Mouse: <i>Hprt</i> Reverse<br>GGGGCTGTAAGCTTAACCAG      | PrimerBank | <a href="http://www.pga.mgh.harvard.edu/primerbank">www.pga.mgh.harvard.edu/primerbank</a> |
| Mouse: <i>Dnmt3a</i> Forward<br>GATGAGCCTGAGTATGAGGATGG | PrimerBank | <a href="http://www.pga.mgh.harvard.edu/primerbank">www.pga.mgh.harvard.edu/primerbank</a> |
| Mouse: <i>Dnmt3a</i> Reverse<br>CAAGACACAATTCGGCCTGG    | PrimerBank | <a href="http://www.pga.mgh.harvard.edu/primerbank">www.pga.mgh.harvard.edu/primerbank</a> |
| Mouse: <i>Ptgs2</i> Forward<br>TGCACTATGGTTACAAAAGCTGG  | PrimerBank | <a href="http://www.pga.mgh.harvard.edu/primerbank">www.pga.mgh.harvard.edu/primerbank</a> |
| Mouse: <i>Ptgs2</i> Reverse<br>TCAGGAAGCTCCTTATTTCCCTT  | PrimerBank | <a href="http://www.pga.mgh.harvard.edu/primerbank">www.pga.mgh.harvard.edu/primerbank</a> |
| Mouse: <i>Tgfb1</i> Forward<br>CTCCCGTGGCTTCTAGTGC      | PrimerBank | <a href="http://www.pga.mgh.harvard.edu/primerbank">www.pga.mgh.harvard.edu/primerbank</a> |
| Mouse: <i>Tgfb1</i> Reverse<br>GCCTTAGTTTGGACAGGATCT    | PrimerBank | <a href="http://www.pga.mgh.harvard.edu/primerbank">www.pga.mgh.harvard.edu/primerbank</a> |
| Mouse: <i>Ptger2</i> Forward<br>TCCCTAAAGGAAAAGTGGGACC  | PrimerBank | <a href="http://www.pga.mgh.harvard.edu/primerbank">www.pga.mgh.harvard.edu/primerbank</a> |
| Mouse: <i>Ptger2</i> Reverse<br>GAGCGCATTAACCTCAGGACC   | PrimerBank | <a href="http://www.pga.mgh.harvard.edu/primerbank">www.pga.mgh.harvard.edu/primerbank</a> |
| Mouse: <i>Ptger4</i> Forward<br>ACCATTCTAGATCGAACCGT    | PrimerBank | <a href="http://www.pga.mgh.harvard.edu/primerbank">www.pga.mgh.harvard.edu/primerbank</a> |
| Mouse: <i>Ptger4</i> Reverse<br>CACCACCCGAAGATGAACAT    | PrimerBank | <a href="http://www.pga.mgh.harvard.edu/primerbank">www.pga.mgh.harvard.edu/primerbank</a> |
| Mouse: <i>Mat2a</i> Forward<br>GCTTCCACGAGGCGTTCAT      | PrimerBank | <a href="http://www.pga.mgh.harvard.edu/primerbank">www.pga.mgh.harvard.edu/primerbank</a> |
| Mouse: <i>Mat2a</i> Reverse<br>AGCATCACTGATTTGGTCACAA   | PrimerBank | <a href="http://www.pga.mgh.harvard.edu/primerbank">www.pga.mgh.harvard.edu/primerbank</a> |

|                                                        |                             |                                                                                            |
|--------------------------------------------------------|-----------------------------|--------------------------------------------------------------------------------------------|
| Mouse: <i>Rbcn</i> Forward<br>CAGGGTGTAGTGCATGGTTCT    | PrimerBank                  | <a href="http://www.pga.mgh.harvard.edu/primerbank">www.pga.mgh.harvard.edu/primerbank</a> |
| Mouse: <i>Rbcn</i> Reverse<br>CCGCCAAGATCCATTCCCG      | PrimerBank                  | <a href="http://www.pga.mgh.harvard.edu/primerbank">www.pga.mgh.harvard.edu/primerbank</a> |
| Mouse: <i>Dusp4</i> Forward<br>CGTGCGCTGCAATACCATC     | PrimerBank                  | <a href="http://www.pga.mgh.harvard.edu/primerbank">www.pga.mgh.harvard.edu/primerbank</a> |
| Mouse: <i>Dusp4</i> Reverse<br>CTCATAGCCACCTTTAAGCAGG  | PrimerBank                  | <a href="http://www.pga.mgh.harvard.edu/primerbank">www.pga.mgh.harvard.edu/primerbank</a> |
| Human: <i>TGFB1</i> Forward<br>CAATTCCTGGCGATACCTCAG   | PrimerBank                  | <a href="http://www.pga.mgh.harvard.edu/primerbank">www.pga.mgh.harvard.edu/primerbank</a> |
| Human: <i>TGFB1</i> Reverse<br>GCACAACTCCGGTGACATCAA   | PrimerBank                  | <a href="http://www.pga.mgh.harvard.edu/primerbank">www.pga.mgh.harvard.edu/primerbank</a> |
| Human: <i>PTSG2</i> Forward<br>CTGGCGCTCAGCCATACAG     | PrimerBank                  | <a href="http://www.pga.mgh.harvard.edu/primerbank">www.pga.mgh.harvard.edu/primerbank</a> |
| Human: <i>PTSG2</i> Reverse<br>CGCACTTATACTGGTCAAATCCC | PrimerBank                  | <a href="http://www.pga.mgh.harvard.edu/primerbank">www.pga.mgh.harvard.edu/primerbank</a> |
| DUSP4 MeDIP Forward<br>CACCCGCAACGATCTCTAC             | Integrated DNA Technologies |                                                                                            |
| DUSP4 MeDIP Reverse<br>AACGGAGACCTAGAGGAAGAA           | Integrated DNA Technologies |                                                                                            |

**Supplementary Table 2: Antibodies, catalogue number, source and dilutions used**

| REAGENT or RESOURCE   | SOURCE                    | IDENTIFIER                       |
|-----------------------|---------------------------|----------------------------------|
| Antibodies            |                           |                                  |
| Rabbit anti-Cox2      | Cayman Chemicals          | Cat# 160126<br>(1:1000 dilution) |
| Rabbit anti-Dnmt3a    | Cell Signaling Technology | Cat# 3598S<br>(1:1000 dilution)  |
| Rabbit IgG-HRP linked | Cell Signaling Technology | Cat# 7074S<br>(1:5000 dilution)  |

|                                                             |                              |                                           |
|-------------------------------------------------------------|------------------------------|-------------------------------------------|
| Rat anti-Mac2                                               | Cederlane                    | Cat# CL8942AP<br>(1:10,000 dilution)      |
| Rabbit anti- $\beta$ -actin-HRP                             | Cell Signaling<br>Technology | Cat# 5125S<br>(1:5000 dilution)           |
| Rabbit anti-MAT2A                                           | Novus Biologicals            | Cat# NB110-<br>94158<br>(1:1000 dilution) |
| Rabbit anti-Phospho-p44/42 MAPK (Erk1/2)<br>(Thr202/Tyr204) | Cell Signaling<br>Technology | Cat# 4370S<br>(1:1000 dilution)           |
| Rabbit anti-p44/42 MAPK (Erk1/2)<br>(Thr202/Tyr204)         | Cell Signaling<br>Technology | Cat# 9102S<br>(1:1000 dilution)           |
| Cox2 (D5H5) XP (R) Alexa 488                                | Cell Signaling<br>Technology | Cat# 13596S<br>(1:100 dilution)           |
| PE anti-mouse F4/80                                         | Biolegend                    | Cat# 123110<br>(1:100 dilution)           |
| APC anti-mouse F4/80                                        | Biolegend                    | Cat# 123116<br>(1:100 dilution)           |
| PB anti-mouse Ly6G                                          | Biolegend                    | Cat# 127612<br>(1:100 dilution)           |
| Alexa fluor 647 anti-ERK1/2<br>Phospho (Thr202/Tyr204)      | Biolegend                    | Cat# 675504<br>(1:100 dilution)           |
| Alexa fluor 488 anti-ERK1/2<br>Phospho (Thr202/Tyr204)      | Biolegend                    | Cat# 675507<br>(1:100 dilution)           |
| PE anti-mouse LAP (TGF- $\beta$ 1)                          | Biolegend                    | Cat# 141404<br>(1:100 dilution)           |
| APC anti-mouse LAP (TGF- $\beta$ 1)                         | Biolegend                    | Cat# 141406<br>(1:100 dilution)           |
| APC anti-mouse Ly-6G/Ly-6C (Gr-1)                           | Biolegend                    | Cat# 108412<br>(1:100 dilution)           |
| FITC Annexin V                                              | Biolegend                    | Cat# 640906<br>(1:50 dilution)            |
| Rabbit IgG                                                  | Sigma-Aldrich                | Cat# PP64B                                |
| Alexa fluor 64 goat anti-rabbit IgG                         | Invitrogen                   | Cat# A21244<br>(1:100 dilution)           |

|                                      |            |                                   |
|--------------------------------------|------------|-----------------------------------|
| Alexa fluor 488 goat anti-rat IgG    | Invitrogen | Cat# A11006<br>(1:100 dilution)   |
| Alexa fluor 594 goat anti-rabbit IgG | Invitrogen | Cat# A11037<br>(1:100 dilution)   |
| Rabbit anti-DUSP4                    | Abcam      | Cat# Ab216576<br>(1:100 dilution) |
| Rabbit anti-COX2                     | Abcam      | Cat# Ab188183<br>(1:100 dilution) |
| Rabbit anti-TGFβ1                    | Abcam      | Cat# Ab92486<br>(1:100 dilution)  |
|                                      |            |                                   |

**Supplementary Table 3: List of chemical reagents used, catalogue number and their source**

| Chemicals, Peptides, and Recombinant Proteins     |                   |                  |
|---------------------------------------------------|-------------------|------------------|
| Dulbecco's Modified Eagle Media (DMEM)            | Corning           | Cat# 10-013-CV   |
| Roswell Park Memorial Institute (RPMI) 1640 Media | Corning           | Cat# 10-040-CV   |
| Opti-MEM                                          | GIBCO             | Cat# 31985-070   |
| 1X PBS                                            | Corning           | Cat# 21-040-CV   |
| CellStripper                                      | Corning           | Cat# 25-056-CI   |
| Modified DMEM                                     | GIBCO             | Cat# 21013024    |
| Heat-Inactivated Fetal Bovine Serum               | GIBCO             | Cat# 10438-026   |
| Fetal Bovine Serum, dialyzed                      | GIBCO             | Cat# 26400064    |
| Penicillin/Streptomycin                           | Corning           | Cat# 30-002-CI   |
| HISTOPAQUE-1077                                   | Sigma-Aldrich     | Cat# 10771-100ML |
| Novex 4-20% Tris-Glycine Mini Gels, 15-well       | Invitrogen        | Cat# XP04205BOX  |
| 4X Laemmli Buffer                                 | Bio-Rad           | Cat# 1610747     |
| PKH26 Fluorescent Cell Linker                     | Sigma-Aldrich     | Cat# PKH26GL-1KT |
| Diluent C                                         | Sigma-Aldrich     | Cat# CGLDIL      |
| U0126                                             | Tocris Bio-Techne | Cat# 1144        |
| LY3200882                                         | Selleckchem       | Cat# S8772       |

|                                                |                          |                  |
|------------------------------------------------|--------------------------|------------------|
| DMSO                                           | Sigma-Aldrich            | Cat# D2650       |
| $\beta$ -mercaptoethanol                       | Bio-Rad                  | Cat# 1610710     |
| Hoechst 33342                                  | Thermo Scientific        | Cat# 62249       |
| Bafilomycin A1                                 | Sigma-Aldrich            | Cat# B1793       |
| Recombinant Mouse TGF $\beta$ 1                | Biolegend                | Cat#763104       |
| Dexamethasone                                  | Calbiochem               | Cat# 265005      |
| Zymosan A                                      | Sigma-Aldrich            | Cat# Z4250       |
| Lipofectamine RNAiMax                          | Life Technologies        | Cat# 13778-150   |
| Neomycin                                       | Sigma-Aldrich            | Cat# N1142       |
| 40 $\mu$ m Nylon Cell Strainers                | BD Falcon                | Cat# 352340      |
| Power SYBR Green PCR Master Mix                | Applied Biosystems       | Cat# 4367659     |
| MAT2A Inhibitor (PF-9366)                      | BioVision                | Cat# B2244-5     |
| S-(5'-Adenosyl)-L-Methionine Chloride          | Sigma-Aldrich            | Cat# A7007       |
| L-Glutamine                                    | Sigma-Aldrich            | Cat# G8540       |
| L-Cystine                                      | Sigma-Aldrich            | Cat# C6727       |
| Sodium Pyruvate                                | Sigma-Aldrich            | Cat# S8636       |
| Prostaglandin E2 ELISA Kit                     | Cayman Chemicals         | Cat#514010       |
| Legend MAX™ Total TGF $\beta$ 1 ELISA Kit      | Biolegend                | Cat# 436707      |
| Methylamp Methylated DNA Capture Kit           | EPIGENTEK                | Cat# P-1015-48   |
| REAGENT or RESOURCE                            |                          |                  |
| 0.45-mm nitrocellulose membranes               | Bio-Rad                  | Cat# 1620115     |
| Hoechst 33342                                  | Thermo Scientific        | Cat# 62249       |
| Lipofectamine RNAiMax                          | Life Technologies        | Cat# 13778-150   |
| Perm buffer II                                 | BD Biosciences           |                  |
| Critical Commercial Assays                     |                          |                  |
| PureLink RNA Mini Kit                          | Thermo Fisher Scientific | Cat# 12183025    |
| TUNEL Kit                                      | Roche                    | Cat# 12156792910 |
| Supersignal West Pico<br>Chemiluminescence Kit | Thermo Fisher Scientific | Cat# 34080       |

**Extended Data Fig. 1. Additional experiments documenting the efferocytosis-*Ptgs2*/COX2-TGF $\beta$ 1 pathway in macrophages. Related to Fig. 1.a-d,** BMDMs were incubated  $\pm$  ACs, after which noninternalized ACs were removed by rinsing. The cells were assayed for *Ptgs2* mRNA after an additional 1 h incubation and COX2 protein after 3 h (a); PGE<sub>2</sub> in the media after 3 h (b); and TGF $\beta$ 1 in the media after 18 h (c). For (d), experiments similar to those in panel a were analyzed for mouse and human *Ptgs2*/*PTGS2* or *Tgfb1*/*TGF $\beta$ 1* mRNA to prove that mRNA being measured is not residual human mRNA derived from human apoptotic Jurkat cells. e, BMDMs were transfected with scrambled RNA (Scr) or siRbcn and then, after 72 h, assayed for *Rbcn* mRNA. f, BMDMs were transfected with Scr or siRbcn or treated with vehicle or bafilomycin A1 and then incubated with PKH26-labeled ACs for 45 min, followed by rinsing and quantification of percent PKH26<sup>+</sup> macrophages of total macrophages. g, BMDMs were transfected with Scr or si*Ptgs2* and then, after 72 h, assayed for *Ptgs2* mRNA. h, BMDMs were incubated  $\pm$  ACs for 45 min, after which noninternalized ACs were removed by rinsing. The cells were assayed for *Ptges* mRNA after an additional 1 h incubation (left). i, BMDMs were transfected with scrambled RNA (Scr) or si*Ptges* and then, after 72 h, assayed for *Ptges* mRNA. j-k, BMDMs were transfected with Scr, si*Ptger4*, or si*Ptger2* and then, after 72 h, assayed for *Ptger4* or *Ptger2* mRNA, respectively. l, BMDMs were transfected with Scr or si*Tgfb1*. After 72 h, the cells were incubated  $\pm$  ACs for 45 min, after which noninternalized ACs were removed by rinsing. After an additional 1 h of incubation, the cells were assayed for *Ptgs2* mRNA. m, BMDMs were transfected with Scr or si*Tgfb1* and then, after 72 h, assayed for *Tgfb1* mRNA. All mRNA data are expressed relative to the first control group. Values are means  $\pm$  SEM. ns, not significant ( $P > 0.05$ ); n = 3 biological replicates. Two-sided  $P$  values were determined by a Student's t-test for two groups or one-way ANOVA with Fisher's LSD posthoc analysis for three or more groups.

**Extended Data Fig. 2. Additional experiments documenting the role of SAM in the efferocytosis-*Ptgs2*/COX2-TGF $\beta$ 1 pathway. Related to Fig. 2.** All AC incubations were 45 min, and *Ptgs2* or *Tgfb1* were assayed 1 or 6 h after AC removal, respectively. a, BMDMs pretreated 2 h with vehicle or the MAT2A inhibitor PF9366 were incubated with pHrodo-labeled ACs and quantified for the percent pHrodo-AC<sup>+</sup> macrophages.

Scale bar, 50  $\mu\text{m}$ . **b-c**, BMDMs treated with scrambled RNA (Scr) or siMat2a were incubated  $\pm$  ACs and then assayed for *Ptgs2* or *Tgfb1*. **d**, BMDMs treated with Scr or siMat2a were assayed for *Mat2a*. **e**, BMDMs treated with vehicle or SAM were assayed for SAM content. **f**, BMDMs cultured in methionine-free media with D-FBS and pretreated for 2 h with vehicle or bafilomycin A1 (Baf) were incubated 1 h with PKH26-labeled ACs whose proteins were labeled with  $^{13}\text{C}_5^{15}\text{N}$ -methionine. AC<sup>+</sup> and AC<sup>-</sup> macrophages were sorted and assayed for SAM content (**g**) and percent  $^{13}\text{C}_5^{15}\text{N}$ -SAM of total SAM (**h**). **i**, Control or DNMT3A-KO BMDMs were incubated with PKH26-labeled ACs and then quantification for the percent PKH26-AC<sup>+</sup> macrophages. Scale bar, 50  $\mu\text{m}$ . **j**, Control and DNMT3A-KO BMDMs were immunoblotted for DNMT3A and  $\beta$ -actin. **k**, HMDMs treated with Scr or siDNMT3A were assayed for *DNMT3A*. **l**, BMDMs were incubated with IgG-coated RBCs for 45 min and then assayed 3 h later for COX2 MFI by flow cytometry. **m-n**, Control and DNMT3A-KO BMDMs treated with LPS or LPS + IFN $\gamma$  for 4 h were assayed for *Il6*, *Ptgs2*, or COX2 (n). **o-p**, BMDMs treated with Scr or siDnmt3a were incubated for 4 h with vehicle and LPS + IFN $\gamma$  or IL4 and assayed for *Nos2* or *Arg1*. **q**, Control and DNMT3A-KO BMDMs were incubated  $\pm$  ACs for 45 min and then assayed for SAM. **r**, BMDMs pretreated for 2 h with vehicle or bafilomycin A1 were incubated  $\pm$  ACs whose proteins were labeled with  $^{13}\text{C}_5^{15}\text{N}$ -methionine and then assayed 1 h after AC removal for  $^{13}\text{C}_5$ -methylcytosine in DNA. **s**, BMDMs treated with Scr or siCreb1 were assayed for *Creb1*. All mRNA data are expressed relative to the first control group. Values are means  $\pm$  SEM. n.s., not significant ( $P > 0.05$ ); n = 3 biological replicates for all bar graphs except i (n = 6). Two-sided  $P$  values were determined by the Student's t-test for two groups or one-way ANOVA with Fisher's LSD posthoc analysis for three or more groups.

**Extended Data Fig. 3. Experiments documenting the role of ERK, CD36, and DUSP4 in the efferocytosis-*Ptgs2*/COX2-TGF $\beta$ 1 pathway. Related to Fig. 4.** AC incubations were 45 min, and *Ptgs2* or *Tgfb1* were assayed 1 or 6 h after AC removal, respectively. **a**, BMDMs incubated  $\pm$  ACs were immunoblotted for p-ERK1/2, ERK1/2, and  $\beta$ -actin. **b**, BMDMs pretreated with vehicle or bafilomycin A1 were incubated  $\pm$  PKH26-labeled ACs for 45 min and assayed by flow cytometry for p-ERK1/2 in PKH26<sup>+</sup>

(AC<sup>+</sup>) and PKH26<sup>-</sup> (AC<sup>-</sup>) macrophages. **c-d**, BMDMs transfected with scrambled RNA (Scr) or siMapk1 and siMapk3 were incubated  $\pm$  ACs for 45 min and immunoblotted for ERK1/2, COX2, and  $\beta$ -actin or assayed for *Ptgs2* or *Tgfb1*. **e**, WT or MerTK-KO BMDMs were incubated with PKH26-labeled ACs and assayed by flow cytometry for p-ERK1/2 or, after a 3-h chase, COX2. **(f)** BMDMs treated with Scr or si*Cd36* were assayed for *Cd36*. **(g)** BMDMs treated with Scr or si*Cd36* were incubated with pHrodo-labeled ACs and, after an 18-h chase, assayed by flow cytometry for TGF $\beta$ 1 in pHrodo<sup>+</sup> (AC<sup>+</sup>) and pHrodo<sup>-</sup> (AC<sup>-</sup>) macrophages. **h**, BMDMs pretreated for 2 h with vehicle or U0126 (MEK inhibitor) were incubated  $\pm$  ACs and assayed for *Dusp4*. **i**, BMDMs treated with Scr, si*Dnmt3a*, si*Dusp4*, or si*Dnmt3a* + si*Dusp4* were assayed for *Dnmt3a* or *Dusp4*. **j-k**, Control or DNMT3A-KO BMDMs transfected with Scr or si*Dusp4* as indicated were incubated  $\pm$  ACs and assayed for *Ptgs2* or *Tgfb1*. **l-m**, Control or DNMT3A-KO BMDMs treated with Scr or si*Dusp1* as indicated were incubated  $\pm$  ACs and assayed for *Ptgs2* or *Tgfb1*. **n-o**, BMDMs treated with Scr, si*Mat2a*, si*Dusp4*, or si*Mat2a* + si*Dusp4* were incubated  $\pm$  ACs and assayed for *Tgfb1*. **p-q**, BMDMs treated with Scr, siMapk1/3, si*Dusp4*, or siMapk1/3 + si*Dusp4* were incubated  $\pm$  ACs and assayed for *Tgfb1*, *Mapk3*, *Mapk1*, and *Dusp4* after a 6-h chase. Data are expressed relative to the first control group. Values are means  $\pm$  SEM. *n.s.*, not significant ( $P > 0.05$ );  $n = 3$  biological replicates. Two-sided  $P$  values were determined by the Student's t-test for two groups or one-way ANOVA with Fisher's LSD posthoc analysis for three or more groups.

**Extended Data Fig. 4. In vivo evidence of AC-induced COX2-TGF $\beta$ 1 pathway.**

**Related to Fig. 5. a-b**, Wild-type (WT) C57BL/6J mice were transplanted with bone marrow from *Vav1Cre<sup>+/-</sup>* (Control) or *Dnmt3a<sup>fl/fl</sup> Vav1Cre<sup>+/-</sup>* (H-DNMT3A-KO) mice and, after 4 weeks, injected with PBS or dexamethasone (DEX). After 4h, the thymus was harvested and immunostained with anti-annexin V to document the initial increase in apoptosis after PBS or DEX injection,  $n=4$  mice per group (**a**). For **b** (left), thymi were immunostained with Mac2 (green) and DNMT3A (Red). White arrows indicate non-macrophage DNMT3A, and brown arrows indicate macrophage DNMT3A. For **b** (right), documentation of co-localized p-ERK1/2, COX2, and Mac2. Representative image from  $n=4$  mice per group. Scale bar, 50  $\mu$ m. **c-d**, Wildtype (WT) C57BL/6J mice transplanted

with bone marrow from control or H-DNMT3A-KO mice were injected i.p. with 1 mg/mL Zymosan A1. After 12 h, peritoneal exudate cells were analyzed by flow cytometry for F4/80<sup>+</sup> and COX2<sup>+</sup> cells (n=4 mice/group) LAP-TGFβ1<sup>+</sup> cells (n= 4 mice/group). **e-m**, *Ldlr*<sup>-/-</sup> (LDLR-KO) mice were transplanted with bone marrow from control or H-DNMT3A-KO mice and, after 4 weeks, fed a western-type diet (WD) for 12 weeks. Aortic root sections were immunostained for Mac2 and DNMT3A. Brown arrows indicate macrophage DNMT3A. Representative image from n=8 mice per group (**e**); body weight, n=10 mice/group (**f**); and the plasma or blood was assayed for the indicated metabolic and immune cell parameters, n=10 mice/group (**g-l**) and the lipoprotein-cholesterol profile by FPLC (**m**). Scale bar, 50 μm. Values are means ± SEM; *n.s.*, not significant (*P* > 0.05). Two-sided *P* values were determined by the Student's t-test for two groups or one-way ANOVA with Fisher's LSD posthoc analysis for three or more groups.

**Extended Data Fig. 5. DNMT3A mediates efferocytosis and resolution in vivo.**

**Related to Fig. 6. a**, BMDMs were pretreated with vehicle or a TGFβ1R inhibitor for 2 h and with vehicle or recombinant TGFβ1 for 1 h, as indicated. The macrophages were then incubated with PKH26-labeled ACs for 45 mins, followed by rinsing and quantification of percent PKH26-AC<sup>+</sup> macrophages of total macrophages, n=4 biological replicates. **b-f**, Wildtype (WT) C57BL/6J mice were transplanted with bone marrow from control or H-DNMT3A-KO mice and, after 4 weeks, injected with PBS or dexamethasone (DEX). After 18 h, the thymi were weighed, n= 7 and 9 mice for PBS and DEX groups respectively (**b**); immunostained for DAPI, TUNEL, and Mac2 (**c**); assayed for F4/80<sup>+</sup> cells, n=5 mice per group (**d**); and assayed for TNF-α, n=3 and 5 mice for PBS and DEX groups respectively and IL-6 by ELISA, n=3 and 4 mice for PBS and DEX groups respectively (**e-f**). The image in b illustrates thymic macrophages with cytoplasmic TUNEL as an example of efferocytosing thymic macrophages. Scale bar, 100 μm. **g**, The peritoneal exudates were assayed for Ly6G<sup>+</sup> polymorphonuclear cells (PMN) 18 hours after Zymosan A1 injection, n=3 mice per group. **h**, Wild-type mice received 200 ng/mL recombinant TGFβ1 i.p. or vehicle control 15 and 20 hours after Zymosan injection and then assayed for the number of PMNs 4 hours later, n=3 mice/group. **i**, *Ldlr*<sup>-/-</sup> (LDLR-KO) mice were transplanted with bone marrow from control

or H-DNMT3A-KO mice and, after 4 weeks, fed a western-type diet (WD) for 12 weeks. Aortic root sections were quantified for lesional area, n=8 mice/group. Values are means  $\pm$  SEM; *n.s.*, not significant ( $P > 0.05$ ). Two-sided  $P$  values were determined by the Student's t-test for two groups or one-way ANOVA with Fisher's LSD posthoc analysis for three or more groups.
