# Supplementary material
Source: PubMed Central journal article supplement (PMC9050866)
Supplement: NIHMS1780101-supplement-Unmodified_gels_for_Ext_Data_Fig__3.pdf [file NIHMS1780101-supplement-Unmodified_gels_for_Ext_Data_Fig__3.pdf]

Extended data figure 3a

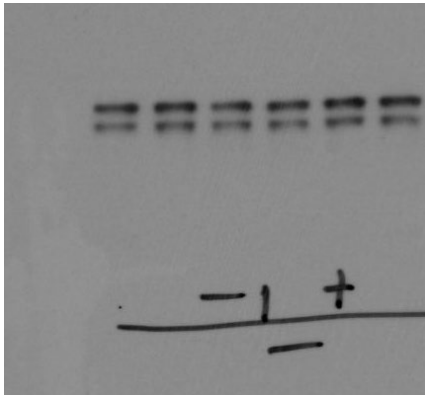

Total ERK1/2

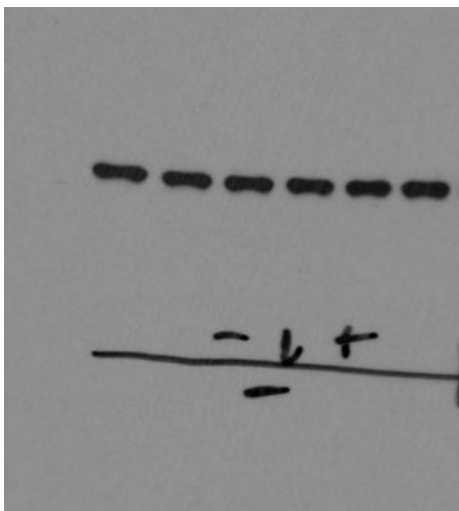

Beta actin

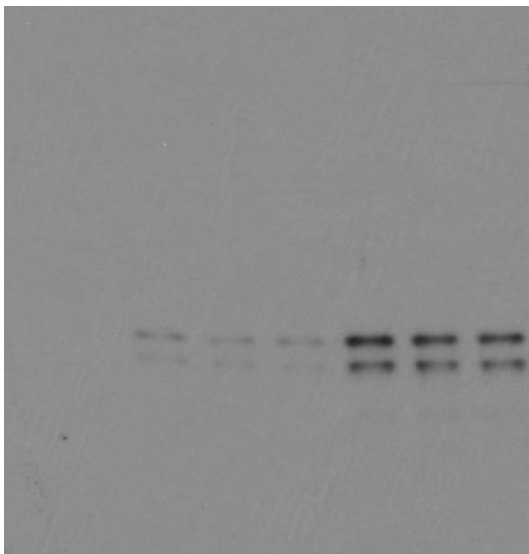

Phospho-ERK1/2

# Extended data figure 3c

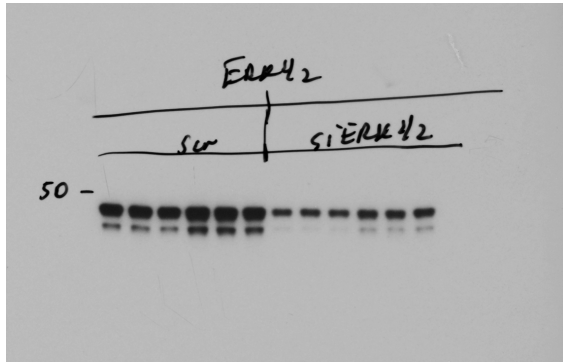

Total-ERK1/2

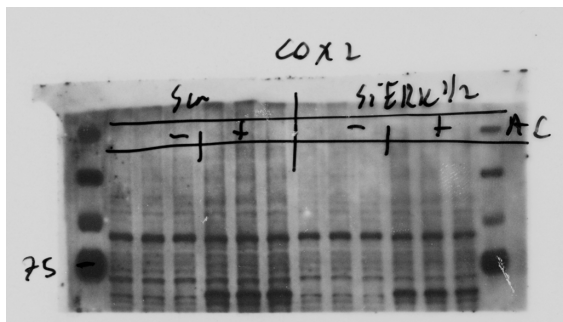

COX2

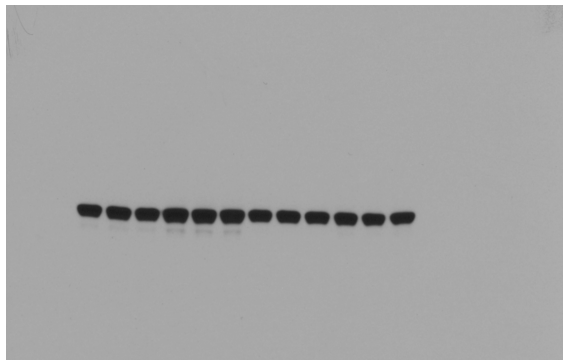

Beta actin
