# Supplementary material
Source: PubMed Central journal article supplement (PMC9050866)

# Extended data figure 1a

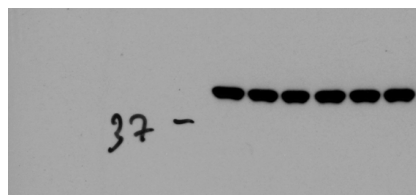

Beta actin

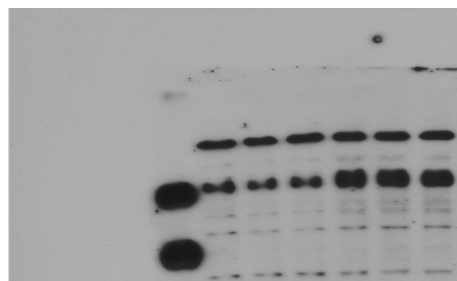

Cox2

Supplement: NIHMS1780101-supplement-Unmodified_gels_for_Ext_Data_Fig__1.pdf [file NIHMS1780101-supplement-Unmodified_gels_for_Ext_Data_Fig__1.pdf]

Extended data figure 2j

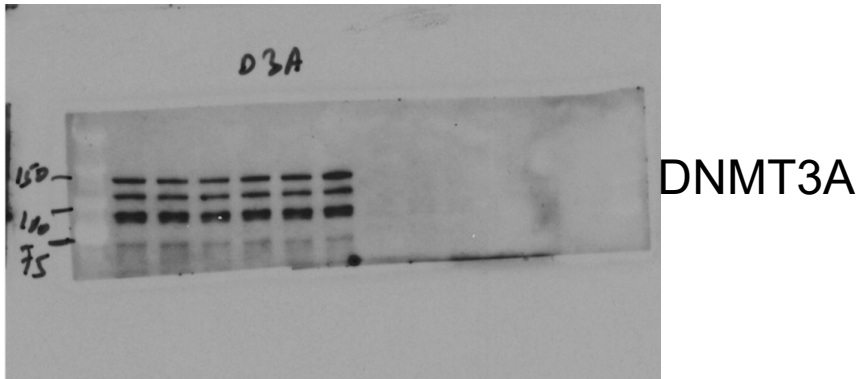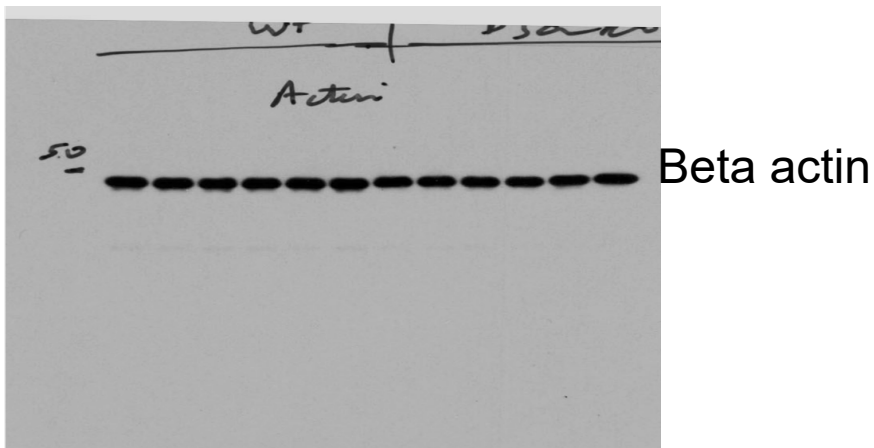

# Extended data figure 2n

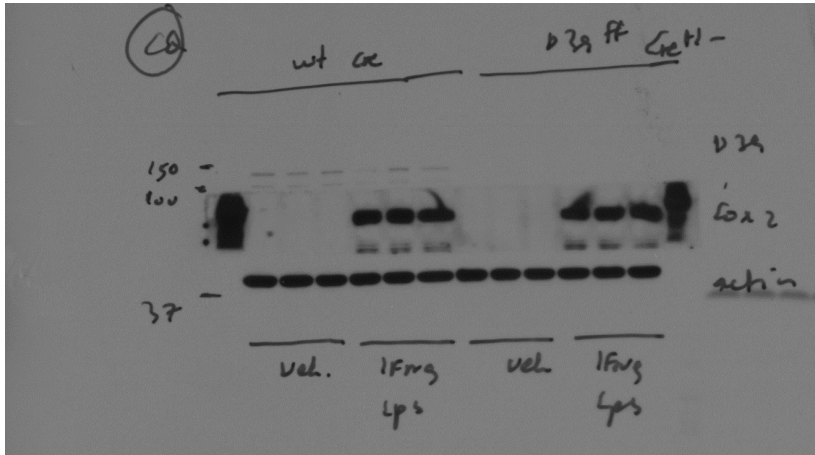

Cox2

Beta actin

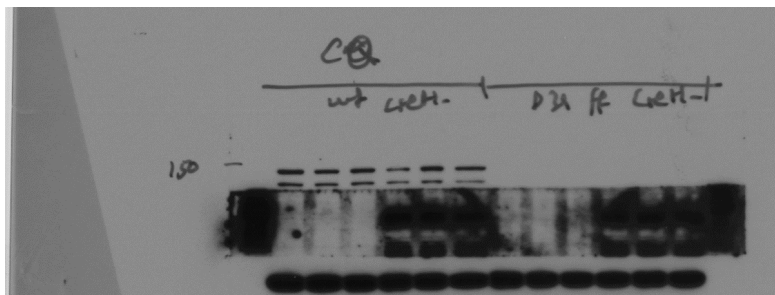

DNMT3A

Supplement: NIHMS1780101-supplement-Unmodified_gels_for_Ext_Data_Fig__2.pdf [file NIHMS1780101-supplement-Unmodified_gels_for_Ext_Data_Fig__2.pdf]

Figure 3b

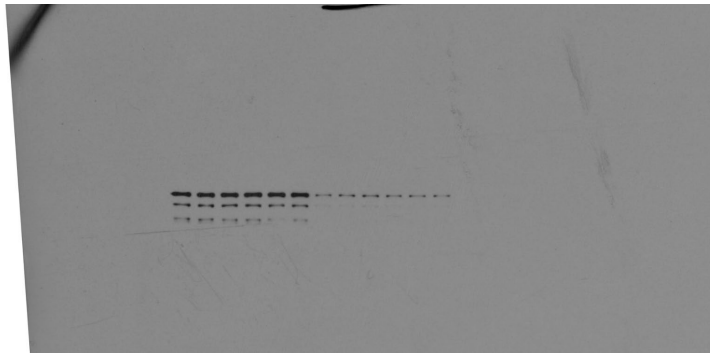

DNMT3A

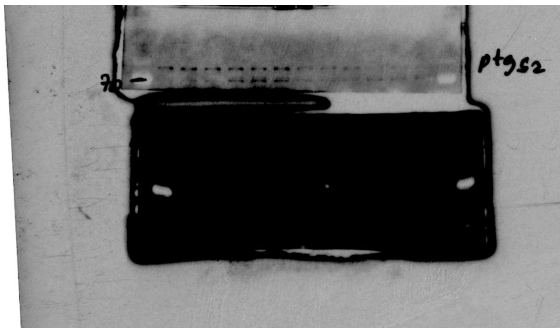

COX2

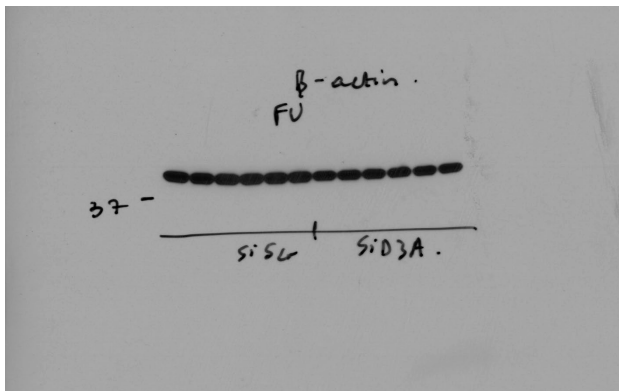

Beta actin

Figure 3m

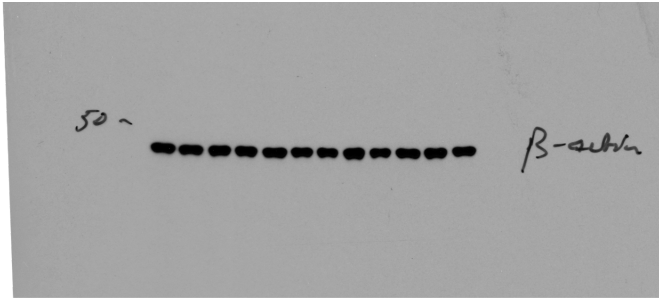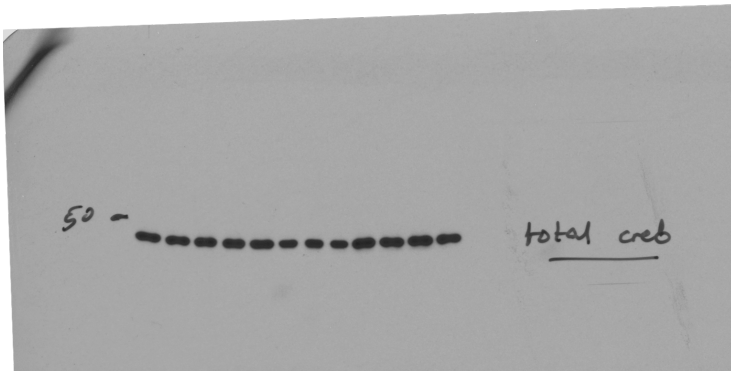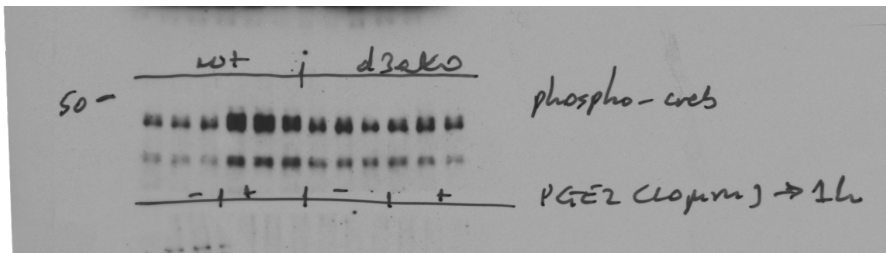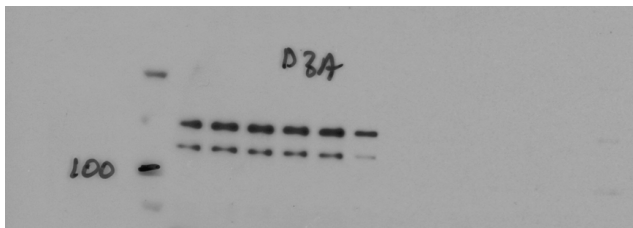

Supplement: NIHMS1780101-supplement-Unmodified_gels_for_Fig__3.pdf [file NIHMS1780101-supplement-Unmodified_gels_for_Fig__3.pdf]
